# Supplementary material for: Dual mechanisms regulating glutamate decarboxylases and accumulation of gamma-aminobutyric acid in tea (Camellia sinensis) leaves exposed to multiple stresses
Source: PubMed Central journal article supplement (PMC4810369; doi:10.1038/srep23685), 2016-03-29
Supplement: srep23685-s1.pdf [file srep23685-s1.pdf]

**Title:** Dual mechanisms regulating *glutamate decarboxylases* and accumulation of gamma-aminobutyric acid in tea (*Camellia sinensis*) leaves exposed to multiple stresses

**Authors:** Xin Mei <sup>1, †</sup>, Yiyong Chen <sup>1,2, †</sup>, Lingyun Zhang <sup>3, †</sup>, Xiumin Fu <sup>1</sup>, Qing Wei <sup>1,3</sup>, Don Grierson <sup>4</sup>, Ying Zhou <sup>1</sup>, Yahui Huang <sup>3</sup>, Fang Dong <sup>5</sup>, Ziyin Yang <sup>1,2 \*</sup>

**Affiliation:**

<sup>1</sup> *Key Laboratory of South China Agricultural Plant Molecular Analysis and Genetic Improvement & Guangdong Provincial Key Laboratory of Applied Botany, South China Botanical Garden, Chinese Academy of Sciences, Xingke Road 723, Tianhe District, Guangzhou 510650, China*

<sup>2</sup> *University of Chinese Academy of Sciences, No.19A Yuquan Road, Beijing 100049, China*

<sup>3</sup> *College of Horticultural Science, South China Agricultural University, Wushan Road, Tianhe District, Guangzhou 510642, China*

<sup>4</sup> *Plant & Crop Sciences Division, School of Biosciences, University of Nottingham, Sutton Bonington Campus, Loughborough LE12 5RD, UK*

<sup>5</sup> *Guangdong Food and Drug Vocational College, Longdongbei Road 321, Tianhe District, Guangzhou 510520, China*

\* Corresponding author. Ziyin Yang, Tel: +86-20-38072989; Email address: zyyang@scbg.ac.cn.

† These authors contributed equally to this work.

## Supplementary Information

**Table S1** Contents of free amino acids in picked (mechanically damaged) tea (*C. sinensis* cv. Jinxuan) leaves under aerobic and anoxic treatments.

| Amino acid<br>μg/g (fresh weight) | 0 h           | 4 h           |               | 6 h           |             |
|-----------------------------------|---------------|---------------|---------------|---------------|-------------|
|                                   |               | Aerobic       | Anoxic        | Aerobic       | Anoxic      |
| P-Ser                             | 101.5±17.1b   | 66.5±4.5a     | 83.3±10.1ab   | 85.2±10.5ab   | 82.3±25.1ab |
| PEA                               | 5.7±0.2a      | 8.3±2.2a      | -             | 6.3±1.9a      | -           |
| Asp                               | 122.0±14.7b   | 168.9±7.8c    | 13.5±2.3a     | 182.5±2.2c    | 12.3±0.9a   |
| Thr                               | 15.3±2.4a     | 23.5±0.9b     | 21.8±2.1ab    | 21.9±2.2ab    | 21.0±0.4b   |
| Ser                               | 38.3±6.9ab    | 40.8±2.7b     | 34.8±3.7ab    | 41.2±6.2ab    | 33.2±0.7a   |
| Asn                               | 5.8±0.4a      | 14.5±1.4c     | 9.1±1.2b      | 16.6±3.4c     | 9.7±0.8b    |
| Glu                               | 222.7±77.7c   | 335.7±20.1cd  | 101.9±17.6b   | 333.1±6.7d    | 45.8±10.5a  |
| Thea                              | 1075.9±122.8a | 1276.6±112.5a | 1281.9±187.2a | 1202.3±385.2a | 1136.5±216a |
| α-AAA                             | 7.6±1.6a      | 8.9±1.1a      | 8.2±0.4a      | 9.2±2.9a      | 6.4±1.2a    |
| Gly                               | 8.6±0.2a      | 11.9±0.4b     | 18.3±2.8c     | 10.9±1.6ab    | 17.1±0.2c   |
| Ala                               | 8.6±1.2a      | 12.7±1.2b     | 169.6±14.9c   | 14.8±3.3ab    | 137.7±11.6c |
| Cit                               | 4.5±0.3a      | 4.5±0.1a      | -             | 4.1±0.5a      | -           |
| α-ABA                             | 2.4±0.3a      | 2.6±0.1a      | 2.5±0.4a      | 2.7±0.4a      | 2.6±0.2a    |
| Val                               | 22.8±1.6b     | 3.5±0.8a      | 34.5±4.3c     | 14.3±18.9abc  | 2.0±0.1a    |
| Cys                               | 3.4±0.4b      | 3.1±0.3ab     | 2.8±0.4ab     | 2.2±0.7ab     | 2.0±0.4a    |
| Ile                               | 8.6±2.5a      | 15.8±0.9c     | 11.5±1.9ab    | 16.9±2.4c     | 12.5±0.6ab  |
| Leu                               | 5.2±1.3a      | 15.4±1.0b     | 13.8±1.6b     | 15.1±1.6b     | 13.9±0.5b   |
| Tyr                               | 18.0±2.9a     | 41.9±1.1b     | 56.0±6.2c     | 39.8±3.4b     | 57.2±2.9c   |
| Phe                               | 18.5±0.9b     | 36.5±1.3c     | 10.0±1.1a     | 42.6±6.1c     | 9.0±0.5a    |
| β-Ala                             | 2.2±0.2a      | 3.8±0.6b      | 7.7±0.9c      | 3.3±0.5ab     | 7.9±0.4c    |
| β-ABA                             | 0.6±0.1a      | 0.7±0.1a      | 0.6±0.2a      | 0.8±0.2a      | 0.7±0.3a    |
| GABA                              | 2.6±0.4a      | 2.0±0.5a      | 161.2±10.5b   | 4.3±1.3a      | 171.3±8.0b  |
| Trp                               | 16.7±4.2ab    | 22.9±1.5b     | 14.8±0.1a     | 21.5±5.9ab    | 16.9±3.9ab  |
| EOHNH <sub>2</sub>                | 22.1±1.8a     | 23.4±1.1a     | 22.4±4.1a     | 20.0±1.9a     | 22.5±0.7a   |
| Lys                               | 5.4±1.3a      | 11.1±1.1b     | 11.1±1.5b     | 10.0±1.1b     | 11.1±0.8b   |
| 1Mehis                            | 6.2±0.3b      | 10.3±0.2c     | 3.8±0.3a      | 9.7±2.1bc     | 3.7±0.9a    |
| His                               | 3.3±1a        | 5.8±1.5ab     | 14.4±2.4c     | 5.8±0.6b      | 16.1±2.5c   |
| Arg                               | 9.8±6.7a      | 14.3±4.1a     | 16.2±5.7a     | 16.1±3.2a     | 11.6±2.6a   |

Data are expressed as mean ± S.D. (n=3). -, not detectable. P-Ser, Phosphoserine. PEA, Phosphorylethanolamine. Asp, Aspartic acid. Thr, Threonine. Ser, Serine. Asn, Asparagine. Glu, Glutamate. Thea, Theanine. α-AAA, α-amino acetic acid. Gly, Glycine. Ala, Alanine. Cit, Citrulline. α-ABA, α-Aminobutyric acid. Val, Valine. Cys, Cystine. Ile, Isoleucine. Leu, Leucine. Tyr, Tyrosine. Phe, Phenylalanine. β-Ala, β-Alanine. β-ABA, β-Aminobutyric acid. GABA, γ-Aminobutyric acid. Trp,

Tryptophan.  $\text{EOH}\text{NH}_2$ , Ethanolamine. Lys, Lysine. 1Mehis, 1-Methyl histidine. His, Histidine. Arg, Arginine. The test tea samples were prepared in June, 2013. Different means with different letters in the same row are significantly different from each other ( $p \leq 0.05$ ).

**Table S2** Primers used in this study

| <b>For CsGAD CDS</b>                  |                                                              |
|---------------------------------------|--------------------------------------------------------------|
| CsGAD1F                               | 5'-GCGGCCGCATGGTTCTGTCAAAGACAACATCG-3'                       |
| CsGAD1R                               | 5'-GTCGACTTAGCAAACACCATTAGTCTTCTT-3'                         |
| CsGAD2F                               | 5'-CCCGGATCCATGGTTCTCTCAAAGACTGCTTC-3'                       |
| CsGAD2R                               | 5'-CCCAAGCTTCTAGCAAATCACTTGTGTTTTCC-3'                       |
| CsGAD3F                               | 5'-ACGCGTCGACCCATGGTTATCTCAAATGTTCAAACC-3'                   |
| CsGAD3R                               | 5'-ATAAGAATGCGGCCGCTAACAACTCCCTTTGTCTTACC-3'                 |
| <b>For mutants</b>                    |                                                              |
| CsGAD1ΔCR                             | 5'-CCCAAGCTTTGACTCTTGGACTACAGC-3'                            |
| CsGAD2ΔCR                             | 5'-CCCAAGCTTAGTCCCATTCTTCCCATTC-3'                           |
| CsGAD3ΔCR                             | 5'-ATAAGAATGCGGCCGCCCTCTCTTCATCGCTT-3'                       |
| <b>For CsGAD transient expression</b> |                                                              |
| CsGAD1F                               | 5'-CTAGTCTAGAATGCACCATCACCATCACCATCGCGTTCTGTCAAAGACAACA-3'   |
| CsGAD1R                               | 5'-CGCGGATCCCGTTAGCAAACACCATTAGTCT-3'                        |
| CsGAD2F                               | 5'-CTAGTCTAGAATGCACCATCACCATCACCATCGCGTTCTCTCAAAGACTGC-3'    |
| CsGAD2R                               | 5'-CGCGGATCCCGCTAGCAAATCACTTGTGTT-3'                         |
| CsGAD3F                               | 5'-CTAGTCTAGAATGCACCATCACCATCACCATCGCGTTATCTCAAATGTTCAAAC-3' |
| CsGAD3R                               | 5'-CGCGTCGACCGCTAACAACTCCCTTTGTCT-3'                         |
| <b>For qPCR</b>                       |                                                              |
| Csβ-ActinF                            | 5'-GCCATATTTGATTGGAATGG-3'                                   |
| Csβ-ActinR                            | 5'-GGTGCCACAACCTTGATCTT-3'                                   |
| CsGABA-T1F                            | 5'-TTCACAGATAACAAGTCACCTAAT-3'                               |
| CsGABA-T1R                            | 5'-TCTCACACTCTGCTCCAA-3'                                     |
| CsGABA-T2F                            | 5'-TAGTATGTTGGCACCATTAC-3'                                   |
| CsGABA-T2R                            | 5'-ACCATAGACCAGCGAGAG-3'                                     |
| CsGABA-T3F                            | 5'-CGCAGTAGAAGTAGCAGTTG-3'                                   |
| CsGABA-T3R                            | 5'-GTCGGTTGTAAGAGATGTGAAT-3'                                 |
| CsSSADH1F                             | 5'-CCACCAAGTCCAGAGATAC-3'                                    |
| CsSSADH1R                             | 5'-GCAAGTCCACAGGTAAGG-3'                                     |
| CsSSADH2F                             | 5'-ACATTCGCTATAACTTCACCAT-3'                                 |
| CsSSADH2R                             | 5'-TCCTCTCTCGGCAGATTAG-3'                                    |
| CsGDH1F                               | 5'-AGGTGGAGTTACGGTTAGTTA-3'                                  |
| CsGDH1R                               | 5'-GCACGAGCAACACGATTA-3'                                     |
| CsGDH2F                               | 5'-TTGTCCTCCTATTACCTCCAT-3'                                  |
| CsGDH2R                               | 5'-GAATCCAAGCCGAGAATGT-3'                                    |
| CsSSR1F                               | 5'-AACATCAGCAGAAGGACAT-3'                                    |
| CsSSR1R                               | 5'-ATCACCAAACACATCATATCAAG-3'                                |
| CsSSR2F                               | 5'-GTGCCATTAGTTCGCCAAT-3'                                    |
| CsSSR2R                               | 5'-TGCTGATGCTTGAGAGGAA-3'                                    |
| CsGAD1F                               | 5'-AGTGACATCCAGAAAGTCTTGCT-3'                                |
| CsGAD1R                               | 5'-CACCATTAGTCTTCTTCCCTACTGAG-3'                             |
| CsGAD2F                               | 5'-TTCGACATCTGCAAGGTGCTCCA-3'                                |

|         |                                 |
|---------|---------------------------------|
| CsGAD2R | 5'-ACTTGTGTTTTCTAGCCAAGAC-3'    |
| CsGAD3F | 5'-TTTCACATAACAAATGCAACGTC-3'   |
| CsGAD3R | 5'-CTCCCTTTGTCTTACCACCCATA-3'   |
| AtACT2F | 5'-TATCGCTGACCGTATGAGCA-3'      |
| AtACT2R | 5'-TTACCTGCTGGAATGTGCTG-3'      |
| AtGAD1F | 5'-CGCTGAGAGACTTGTGATCG-3'      |
| AtGAD1R | 5'-TTCTTCACCGTGACCATCAA-3'      |
| AtGAD2F | 5'-ACACTCGCGGAGAGACTTGT-3'      |
| AtGAD2R | 5'-CCATCAGAATCTCCTTCTCCA-3'     |
| AtGAD3F | 5'-GCCAAGATGGCTAGTGGAAA-3'      |
| AtGAD3R | 5'-GGTAATACTTGCTACTAACGGAACG-3' |
| AtGAD4F | 5'-GTTACGCCAAGATGGCTAA-3'       |
| AtGAD4R | 5'-GCAAATTGTGTTCTTGTGGTC-3'     |
| AtGAD5F | 5'-CGAGGCCTTGACAGATAGACT-3'     |
| AtGAD5R | 5'-GGACATCTTGGCAGTCTTCAC-3'     |

---

GABA-T, GABA transaminase. GAD, glutamate decarboxylase. GDH, glutamate dehydrogenase. SSADH, succinic semialdehyde dehydrogenase. SSR, succinic semialdehyde reductase. The Accession Numbers of Cs $\beta$ -Actin, CsGABA-T1, CsGABA-T2, CsSSADH1, CsSSADH2, CsGDH1, CsGDH2, CsSSR1, CsSSR2, and AtACT2 are HQ420251, GBBZ01005465, KA282884, HP727388, HP728333, GBBZ01002276, GBBZ01009549, GAAC01043686, GARM01012969, and NM\_112764, respectively.

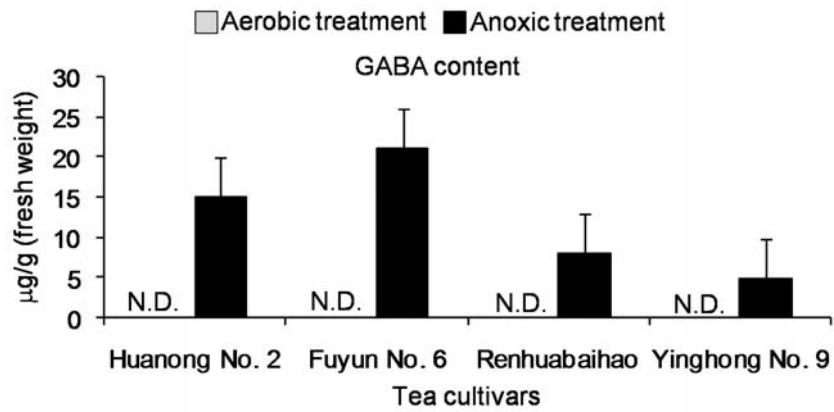

**Figure S1** Contents of GABA in different cultivars of picked tea leaves (with mechanical damage) in air and anoxia.

GABA, gamma-aminobutyric acid. The tea leaves were treated under anoxic condition for 6 h. N.D., not detectable. Data are expressed as mean  $\pm$  S.D. (n=3).

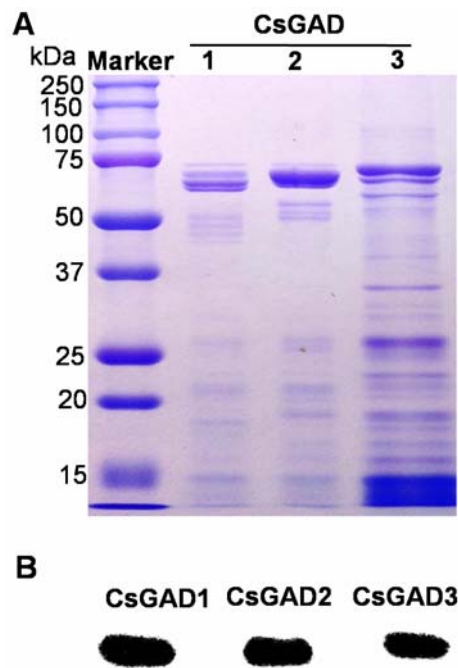

**Figure S2** SDS-PAGE (A) and Western Blot (B) analyses of CsGADs expressed in *E. coli*. GAD, glutamate decarboxylase. The CsGADs were the partially purified expressed S-tagged recombinant proteins.

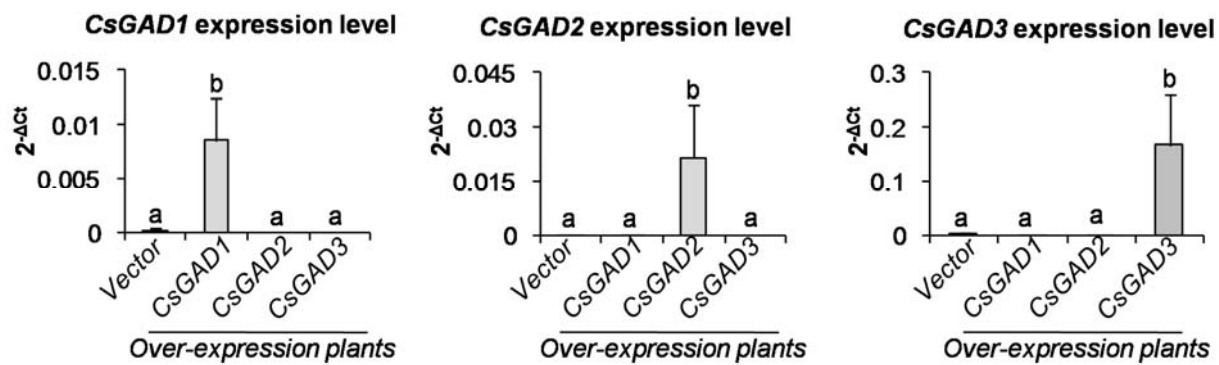

**Figure S3** *Agrobacterium*-mediated transient expression of *CsGADs* mRNAs in *Nicotiana benthamiana*.

GAD, glutamate decarboxylase.  $2^{-\Delta C_t}$  value was calculated based on comparison with beta-actin. Means distinguished with different letters are significantly different from each other ( $p \leq 0.05$ ).



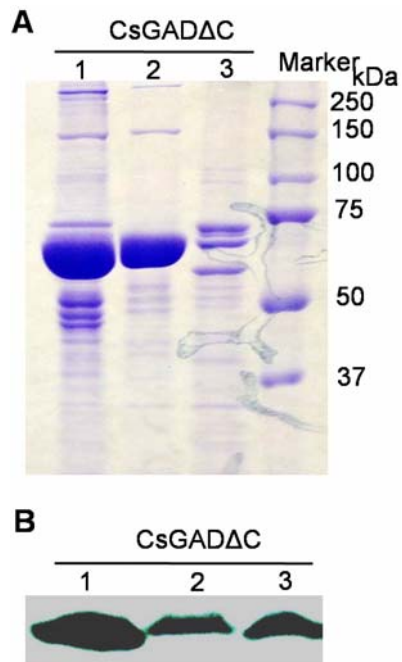

**Figure S4** SDS-PAGE (A) and Western Blot (B) analyses of CsGAD $\Delta$ C s expressed in *E. coli*.

GAD $\Delta$ C, C-terminal truncated glutamate decarboxylase. The loading amounts of CsGAD1 $\Delta$ C, 2 $\Delta$ C and 3 $\Delta$ C were 0.3  $\mu$ g, 0.1  $\mu$ g, and 2  $\mu$ g, respectively. The expressed CsGAD $\Delta$ Cs S-tagged recombinant proteins, were detected using S-tag antibody.

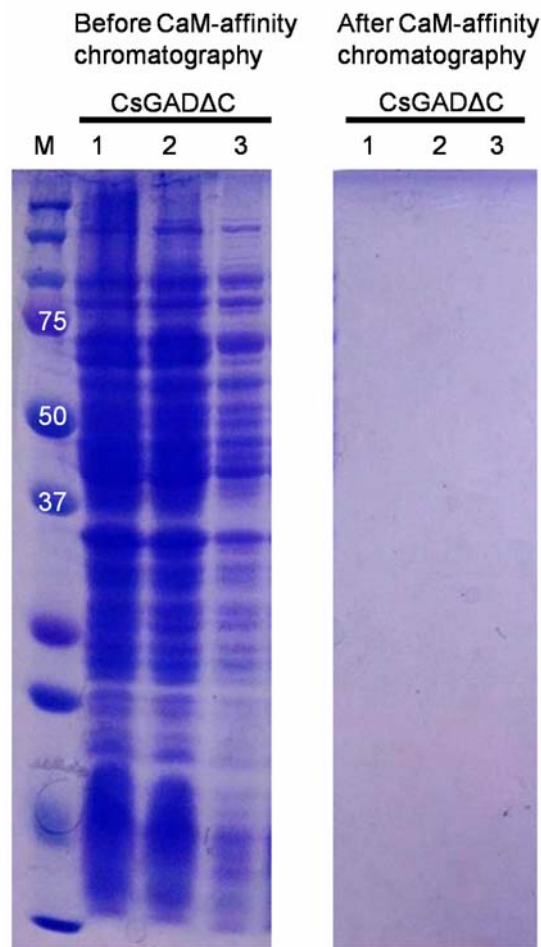

**Figure S5** Determination of CaM-binding ability of CsGAD $\Delta$ Cs expressed in *E. coli*.

GAD $\Delta$ C, C-terminal truncated glutamate decarboxylase. The CaM-affinity chromatography only detects proteins with CaM-binding ability. Any protein eluted from the CaM-affinity chromatography column is detected by SDS-PAGE, and is determined as having CaM-binding ability. No CsGAD $\Delta$ Cs proteins were visible by SDS-PAGE, suggesting that the CsGAD $\Delta$ Cs had no CaM-binding ability. M, molecular weight markers. A positive control was shown in the Figure 4A, suggesting that only the full-length CsGAD1 had CaM-binding ability.

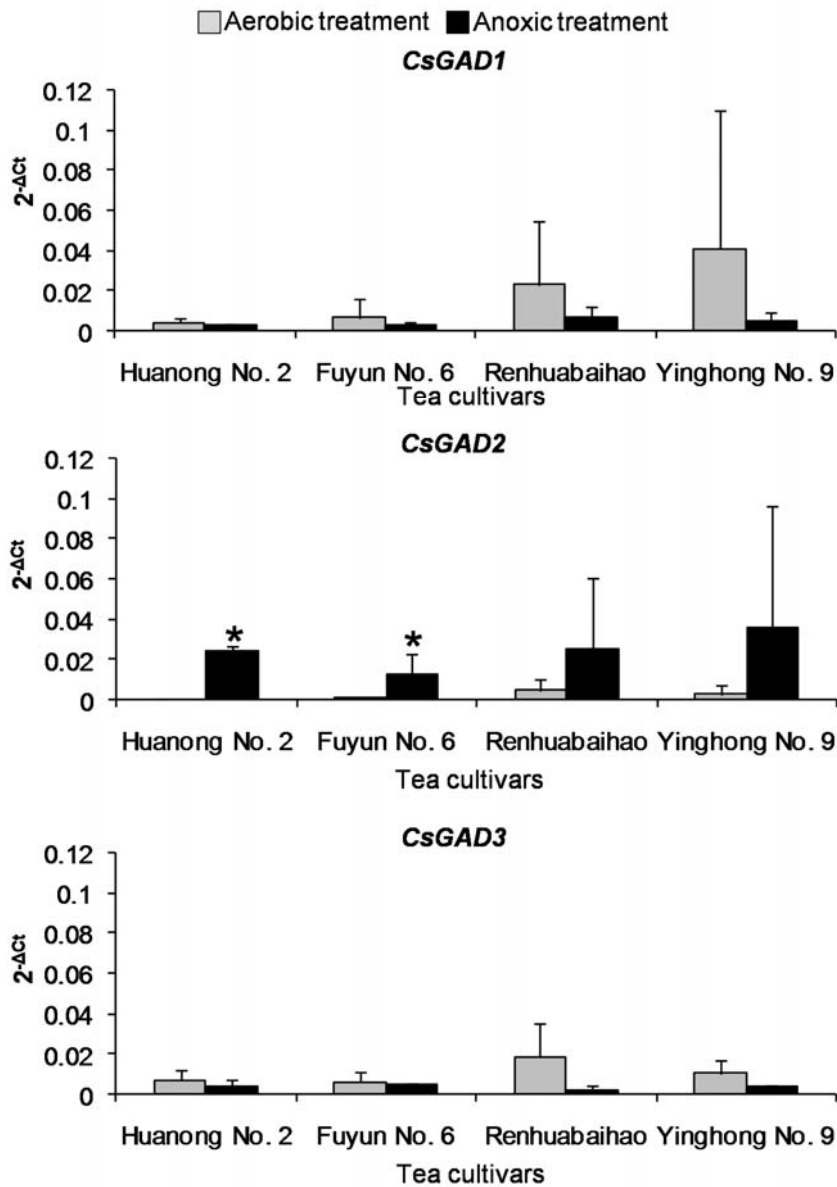

**Figure S6** Expression levels of *CsGADs* in picked (mechanically damaged) tea leaves of different cultivars under aerobic and anoxic treatments

GAD, glutamate decarboxylase. The tea leaves were treated under anoxic condition for 6 h. Data are expressed as mean  $\pm$  S.D. (n=3).  $2^{-\Delta C_t}$  value was calculated based on comparison with beta-actin. \*,  $p < 0.05$ .

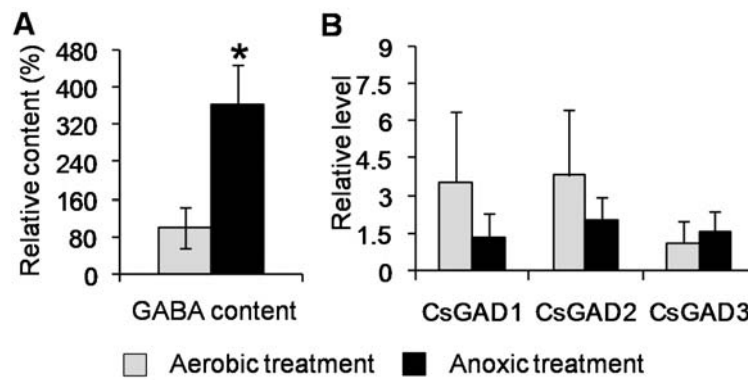

**Figure S7 Effect of anoxia treatment on the GABA content and *CsGADs* mRNA levels in intact tea leaves**

GABA, gamma-aminobutyric acid. GAD, glutamate decarboxylase. Tea leaves (*C. sinensis* cv.

Jinxuan) were treated under anoxic conditions for 6 h. (A) The relative content (%) of GABA was

calculated based on the GABA content of aerobic treatment (set as 100%). “\*” indicates that anoxic

treatment significantly elevated GABA content ( $p < 0.05$ ). (B) Transcript abundance was calculated

based on the difference in cycle threshold (Ct) values between *CsGADs* and beta-actin transcripts by

the normalized relative quantification  $2^{-\Delta\Delta C_t}$  method. The expression levels of the *CsGADs* in the tea

leaves picked at 0 h were defined as 1.

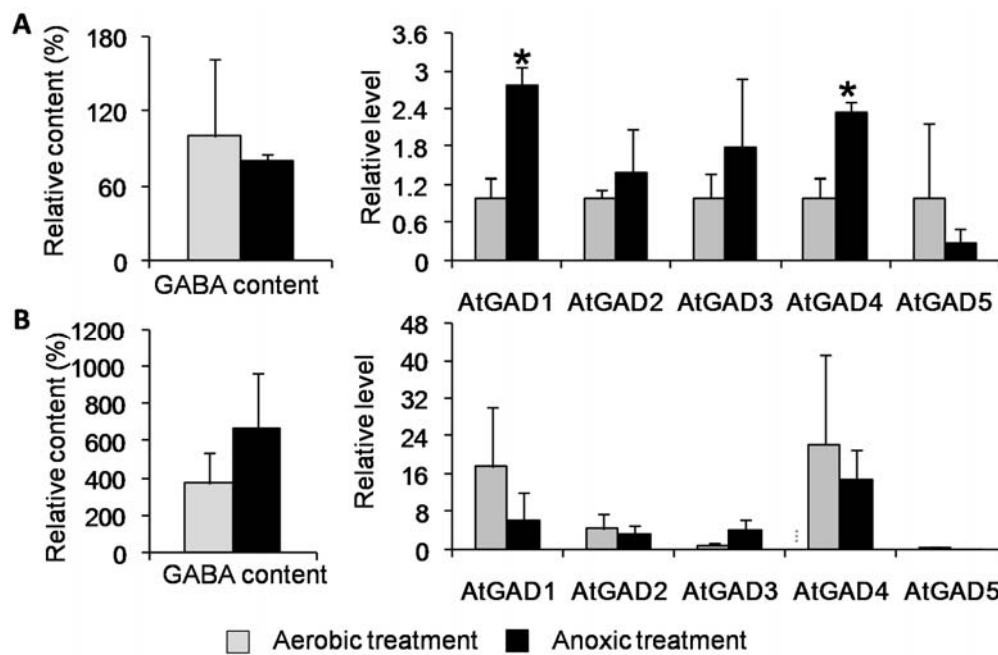

**Figure S8 Effect of anoxia treatment on GABA content and levels of *AtGADs* mRNAs in the intact (A) and picked leaves (B) of *Arabidopsis thaliana***

GABA, gamma-aminobutyric acid. GAD, glutamate decarboxylase. Leaves were treated under conditions of anoxia for 6 h. The relative content (%) of GABA was calculated based on the GABA content of intact leaves under aerobic treatment (set as 100%). “\*” indicates that anoxia significantly elevated *AtGAD1* and *AtGAD4* expression levels in the intact leaves ( $p < 0.05$ ). Transcript abundance was calculated based on the difference in cycle threshold (Ct) values between *AtGADs* and beta-actin transcripts by the normalized relative quantification  $2^{-\Delta\Delta C_t}$  method. The expression levels of the *AtGADs* of intact leaves under aerobic treatment were defined as 1.

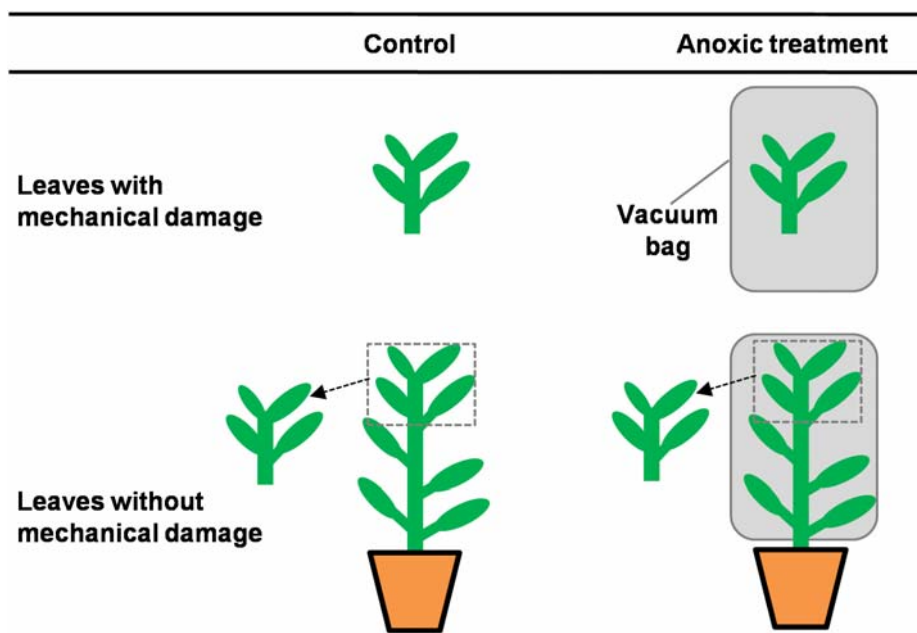

**Figure S9** Anoxic treatments and mechanical damage applied to tea leaves.

Tea leaves (*C. sinensis* cv. “Jinxuan”) were obtained from the tea seedlings grown under a controlled condition of 22-25°C and 12 h light/ 12 h dark. The anoxic treatments were carried out using a Vacuum Sealer (Deni, TVS-2013) at 25°C, 70% humidity in the dark. The air in the vacuum bag was drawn out by the Vacuum Sealer. The mechanical damage was induced by picking.
